# Supplementary material for: Generation and Storage of Random Voltage Values via Ring Oscillators Comprising Feedback Field-Effect Transistors
Source: MDPI journal article supplement (doi:10.3390/nano14070562), 2024-03-23
Supplement: s1 [file s1]

## Supporting Information

# Generation and Storage of Random Voltage Values via Ring Oscillators Comprising Feedback Field-Effect Transistors

**Jaemin Son, Juhee Jeon, Kyoungah Cho \* and Sangsig Kim \***

Department of Electrical Engineering, Korea University, 145 Anam-ro, Seongbuk-gu, Seoul 02841, Republic of Korea;  
jaeminson@korea.ac.kr (J.S.); isdf35@korea.ac.kr (J.J.)

\* Correspondence: chochem@korea.ac.kr (K.C.); sangsig@korea.ac.kr (S.K.); Tel.: +82-2-3290-3245 (S.K.); Fax: +82-2-3290-3894 (S.K.)

**Table S1. Detailed simulation models and parameters.**

| Type                         | Model                                     | Equation                                                                                                                                                                                                                                                                                                                                                                                                          | Parameter                                                                                                                                                                                                                                                                                                                                                                                                           |
|------------------------------|-------------------------------------------|-------------------------------------------------------------------------------------------------------------------------------------------------------------------------------------------------------------------------------------------------------------------------------------------------------------------------------------------------------------------------------------------------------------------|---------------------------------------------------------------------------------------------------------------------------------------------------------------------------------------------------------------------------------------------------------------------------------------------------------------------------------------------------------------------------------------------------------------------|
| Carrier statistics           | Fermi-dirac statistics                    | $n = N_C F_{1/2} \left( \frac{E_{F,n} - E_C}{kT} \right),$ $p = N_V F_{1/2} \left( \frac{E_V - E_{F,p}}{kT} \right)$                                                                                                                                                                                                                                                                                              | -                                                                                                                                                                                                                                                                                                                                                                                                                   |
| Effective intrinsic density  | Bandgap narrowing (Slotboom)              | $\Delta E_g^0 = E_{ref} \left[ \ln \left( \frac{N_{tot}}{N_{ref}} \right) + \sqrt{\left( \ln \left( \frac{N_{tot}}{N_{ref}} \right) \right)^2 + 0.5} \right]$                                                                                                                                                                                                                                                     | $E_{ref} = 6.92 \times 10^{-3},$<br>$N_{ref} = 1.3 \times 10^{17}$                                                                                                                                                                                                                                                                                                                                                  |
| Carrier mobility             | Inversion and accumulation layer mobility | <p>Electron mobility :</p> $c = n, c_{other} = p, N_{inv} = N_{A,0}, N_{acc} = N_{D,0},$ $P = P_e, m^* = m_e^*, m_{other}^* = m_h^*$ <p>Hole mobility :</p> $c = p, c_{other} = n, N_{inv} = N_{D,0}, N_{acc} = N_{A,0},$ $P = P_h, m^* = m_h^*, m_{other}^* = m_e^*$                                                                                                                                             | $N_{D,ref} = 4 \times 10^{20} \text{ cm}^{-3},$<br>$N_{A,ref} = 7.2 \times 10^{20} \text{ cm}^{-3},$<br>$c_D = 0.21,$<br>$c_A = 0.5,$<br>$m_e^*/m_0 = 1.0,$<br>$m_h^*/m_0 = 1.0,$                                                                                                                                                                                                                                   |
|                              | High field saturation (basic)             | $\mu = \mu_{low} \left( \frac{300 \text{ K}}{T_c} \right)$                                                                                                                                                                                                                                                                                                                                                        | -                                                                                                                                                                                                                                                                                                                                                                                                                   |
| Recombination and generation | Shockley-read-hall (doping dependency)    | $\tau_{dop}(N_{A,0} + N_{D,0}) = \tau_{min} + \frac{\tau_{max} - \tau_{min}}{1 + \left( \frac{N_{A,0} + N_{D,0}}{N_{ref}} \right)^\gamma}$                                                                                                                                                                                                                                                                        | $\tau_{min} = 0(e), 0(h)$<br>$\tau_{max} = 1 \times 10^{-5} \text{ s}(e), 3 \times 10^{-6} \text{ s}(h)$<br>$N_{ref} = 1 \times 10^{16} \text{ cm}^{-3}(e),$<br>$1 \times 10^{16} \text{ cm}^{-3}(h)$<br>$\gamma = 1$                                                                                                                                                                                               |
|                              | Auger                                     | $R_{net}^A = (C_n n + C_p p)(np - n_{i,eff}^2),$ $C_n(T) = \left( A_{A,n} + B_{A,n} \left( \frac{T}{T_0} \right) + C_{A,n} \left( \frac{T}{T_0} \right)^2 \right) \left[ 1 + H_n \exp \left( -\frac{n}{N_{0,n}} \right) \right],$ $C_n(T) = \left( A_{A,p} + B_{A,p} \left( \frac{T}{T_0} \right) + C_{A,p} \left( \frac{T}{T_0} \right)^2 \right) \left[ 1 + H_p \exp \left( -\frac{p}{N_{0,p}} \right) \right]$ | $A_{A,n} = 6.7 \times 10^{-32} \text{ cm}^{-3} \text{ s}^{-1},$<br>$A_{A,h} = 7.2 \times 10^{-32} \text{ cm}^{-3} \text{ s}^{-1},$<br>$C_{A,n} = -2.2 \times 10^{-32} \text{ cm}^{-3} \text{ s}^{-1},$<br>$C_{A,h} = -2.2 \times 10^{-32} \text{ cm}^{-3} \text{ s}^{-1},$<br>$H_e = 3.46667,$<br>$H_h = 8.25688,$<br>$N_{0,e} = 1 \times 10^{18} \text{ cm}^{-3},$<br>$N_{0,h} = 1 \times 10^{18} \text{ cm}^{-3}$ |

**Table S2. Randomness test results of the FBFET-based ring oscillator under NIST SP800-22 test suite.**

| Test type                         | P-value             | Result |
|-----------------------------------|---------------------|--------|
| Frequency (Monobit)               | 0.7962534147376393  | Random |
| Frequency within a Block          | 0.7962534147376393  | Random |
| Runs                              | 0.18883007821588327 | Random |
| Non-overlapping Template Matching | 0.9992522603315008  | Random |
| Serial                            | 0.4989610874592239  | Random |
| Approximate Entropy               | 1.0                 | Random |
| Cumulative Sums (Forward)         | 1.0388250053759687  | Random |
| Cumulative Sums (Backward)        | 0.8470584065743881  | Random |
| Random Excursions                 | 0.9821754508742055  | Random |
| Random Excursions Variant         | 0.7150006546880893  | Random |

### S1. Electrical characteristics of FBFETs regarding lateral diffusion of dopants

Figure S1(a) and S1(b) illustrate schematic diagrams and transfer characteristics for the  $n$ - and  $p$ -FBFETs with varying gaussian doping profiles, respectively. These gaussian doping profiles simulate the lateral diffusion of dopants. As the lateral diffusion intensifies, the memory window widths for both the  $n$ - and  $p$ -FBFETs increase due to the reduced length of channel doping regions. Nevertheless, the FBFETs consistently demonstrated robust switching and memory capabilities even when the lateral diffusion is intensified.

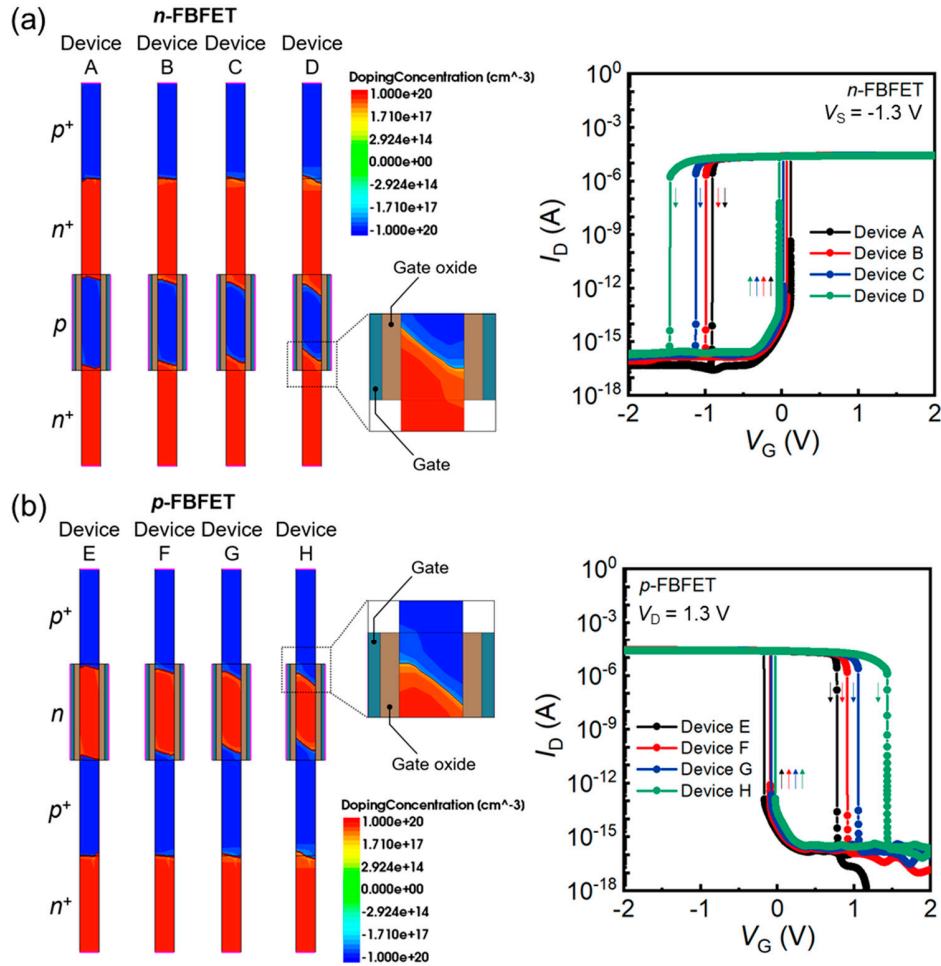

**Figure S1.** Schematic diagrams and transfer characteristics of (a)  $n$ -FBFETs and (b)  $p$ -FBFETs with various gaussian doping profiles.

## S2. Retention characteristics of ring oscillator depending on FBFET channel thickness

Figure S2 shows both the positive and negative  $V_{OUT}$  retention properties of the ring oscillators with varying FBFET channel thickness ( $T_{Si}$ ). As the  $T_{Si}$  increases, the average  $V_{OUT}$  retention time of the ring oscillator decreases; the average retention times are estimated to be 5500 s for  $T_{Si} = 10$  nm, 1363 s for  $T_{Si} = 30$  nm, and 638 s for  $T_{Si} = 50$  nm.

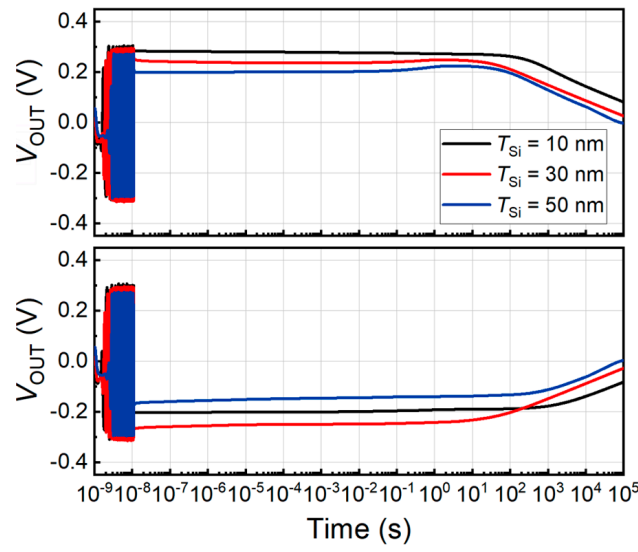

**Figure S2.** Positive and negative  $V_{OUT}$  retention properties of ring oscillators with various  $T_{Si}$
